# Supplementary material for: The molecular, electronic, bonding, and photophysical features of the [(c-Pt3)Tl(c-Pt3)]+ inorganic metallocenes
Source: Royal Society of Chemistry journal article supplement (doi:10.1039/c3dt50718a), 2013-01-01
Supplement: c3dt50718a.pdf [file c3dt50718a.pdf]

# The molecular, electronic, bonding, and photophysical features of the $[(c\text{-Pt}_3)\text{Tl}(c\text{-Pt}_3)]^+$ inorganic metallocenes

*Athanassios C. Tsipis\* and George N. Gekas*

*Laboratory of Inorganic and General Chemistry, Department of Chemistry, University of Ioannina,  
451 10 Ioannina, Greece, E-mail: attsipis@uoi.gr*

## Table of Contents

|                                                                                                                                                                                                                                                                                                                                                                                                                                                                                                 |       |
|-------------------------------------------------------------------------------------------------------------------------------------------------------------------------------------------------------------------------------------------------------------------------------------------------------------------------------------------------------------------------------------------------------------------------------------------------------------------------------------------------|-------|
| <b>Complete list of reference 14.</b>                                                                                                                                                                                                                                                                                                                                                                                                                                                           | S3    |
| <b>Figure S1.</b> 3D contour plots of the bonding MOs related with Pt <sub>3</sub> ⋯Tl <sup>+</sup> ⋯Pt <sub>3</sub> covalent interactions.                                                                                                                                                                                                                                                                                                                                                     | S4    |
| <b>Figure S2.</b> 3D contour plots of the MOs involved in the electronic transitions of the absorption spectra of the { [Pt <sub>3</sub> (μ <sub>2</sub> -L) <sub>3</sub> (L') <sub>3</sub> ] <sub>2</sub> (μ <sub>6</sub> -Tl) } <sup>+</sup> clusters at the B3LYP/LANL2TZ(f)(Pt) ∪ 6-31G(d,p)(E) level.                                                                                                                                                                                      | S5    |
| <b>Table S1.</b> Structural changes of selected structural parameters of the { [Pt <sub>3</sub> (μ <sub>2</sub> -L) <sub>3</sub> (L') <sub>3</sub> ] <sub>2</sub> (μ <sub>6</sub> -Tl) } <sup>+</sup> sandwiches, upon S <sub>0</sub> → T <sub>1</sub> excitation, calculated at the B3LYP/LANL2TZ(f)(Pt) ∪ 6-31G(d,p)(E) level.                                                                                                                                                                | S6    |
| <b>Table S2.</b> Absolute difference between the structural changes of selected structural parameters of the { [Pt <sub>3</sub> (μ <sub>2</sub> -L) <sub>3</sub> (L') <sub>3</sub> ] <sub>2</sub> (μ <sub>6</sub> -Tl) } <sup>+</sup> sandwiches and { [Pt <sub>3</sub> (μ <sub>2</sub> -L) <sub>3</sub> (L') <sub>3</sub> ](μ <sub>6</sub> -Tl) } <sup>+</sup> half-sandwiches, upon S <sub>0</sub> → T <sub>1</sub> excitation, calculated at the B3LYP/LANL2TZ(f)(Pt) ∪ 6-31G(d,p)(E) level. | S7    |
| <b>Table S3.</b> Cartesian coordinates and energetic results of the { [Pt <sub>3</sub> (μ <sub>2</sub> -L) <sub>3</sub> (L') <sub>3</sub> ] <sub>2</sub> (μ <sub>6</sub> -Tl) } <sup>+</sup> sandwich-type clusters at the B3LYP/LANL2TZ(f)(Pt) ∪ 6-31G(d,p)(E) level.                                                                                                                                                                                                                          | S8-18 |

**List of authors in Ref. 14**

Gaussian 09, Revision A.02, Frisch, M. J.; Schlegel, H. B.; Scuseria, G. E.; Robb, M. A.; Cheeseman, J. R.; Zakrzewski, V. G.; Montgomery, J. A.; Vreven, T.; Kudin, K. N.; Burant, J. C.; Millan, J. M.; Iyengar, S. S.; Tomasi, J.; Barone, V.; Mennucci, B.; Cossi, M.; Scalmani, G.; Rega, N.; Petersson, G. A.; Nakatsuji, H.; Hada, M.; Ehara, M.; Toyota, K.; Fukuda, R.; Hasegawa, J.; Ishida, M.; Nakajima, T.; Honda, Y.; Kitao, O.; Nakai, H.; Klene, M.; Li, X.; Knox, J. E.; Hratchian, H. P.; Cross, J. B.; Adamo, C.; Jaramillo, J.; Gomperts, R.; Stratmann, R. E.; Yazyev, O.; Austin, A. J.; Cammi, R.; Pomelli, C.; Ochterski, J. W.; Ayala, P. Y.; Morokuma, K.; Voth, G. A.; Salvador, P.; Dannenberg, J. J.; Zakrzewski, V. G.; Dapprich, S.; Daniels, A. D.; Strain, M. C.; Farkas, O.; Malick, D. K.; Rabuck, A. D.; Raghavachari, K.; Foresman, J. B.; Ortiz, J. V.; Cui, Q.; Baboul, A. G.; Clifford, S.; Cioslowski, J.; Stefanov, B. B.; Liu, G.; Liashenko, A.; Piskorz, P.; Komaromi, I.; Martin, R. L.; Fox, D. J.; Keith, T.; Al-Laham, M. A.; Peng, C. Y.; Nanayakkara, A.; Challacombe, M.; Gill, P. M. W.; Johnson, B.; Chen, W.; Wong, M. W.; Gonzalez, C.; Pople, J. A. Gaussian, Inc., Wallingford CT, 2009

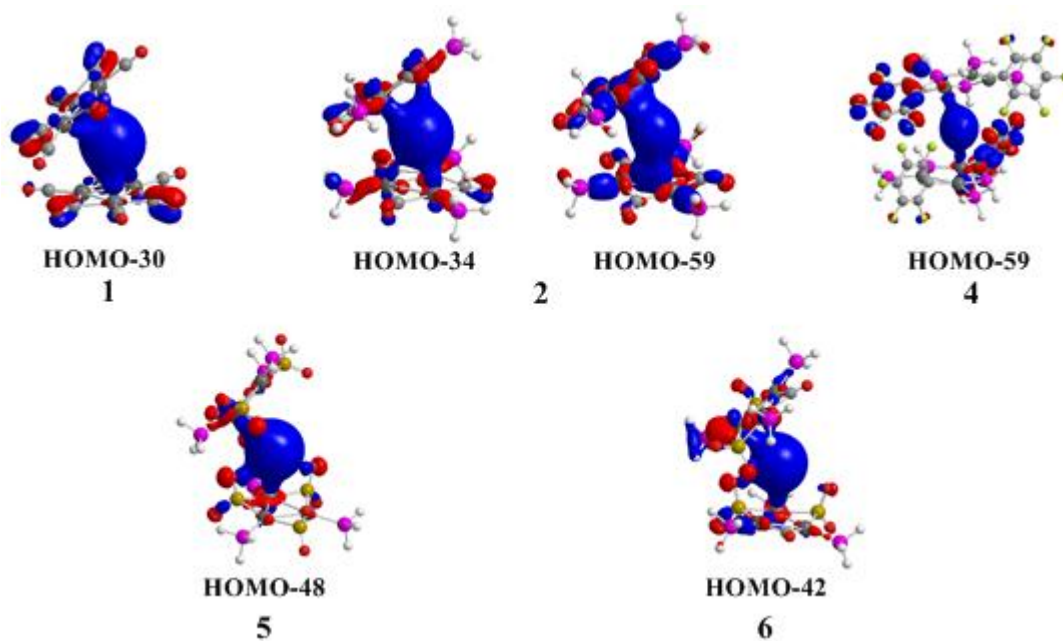

**Fig. S1** 3D contour plots of the bonding MOs related with  $\text{Pt}_3 \cdots \text{Tl}^+ \cdots \text{Pt}_3$  covalent interactions.

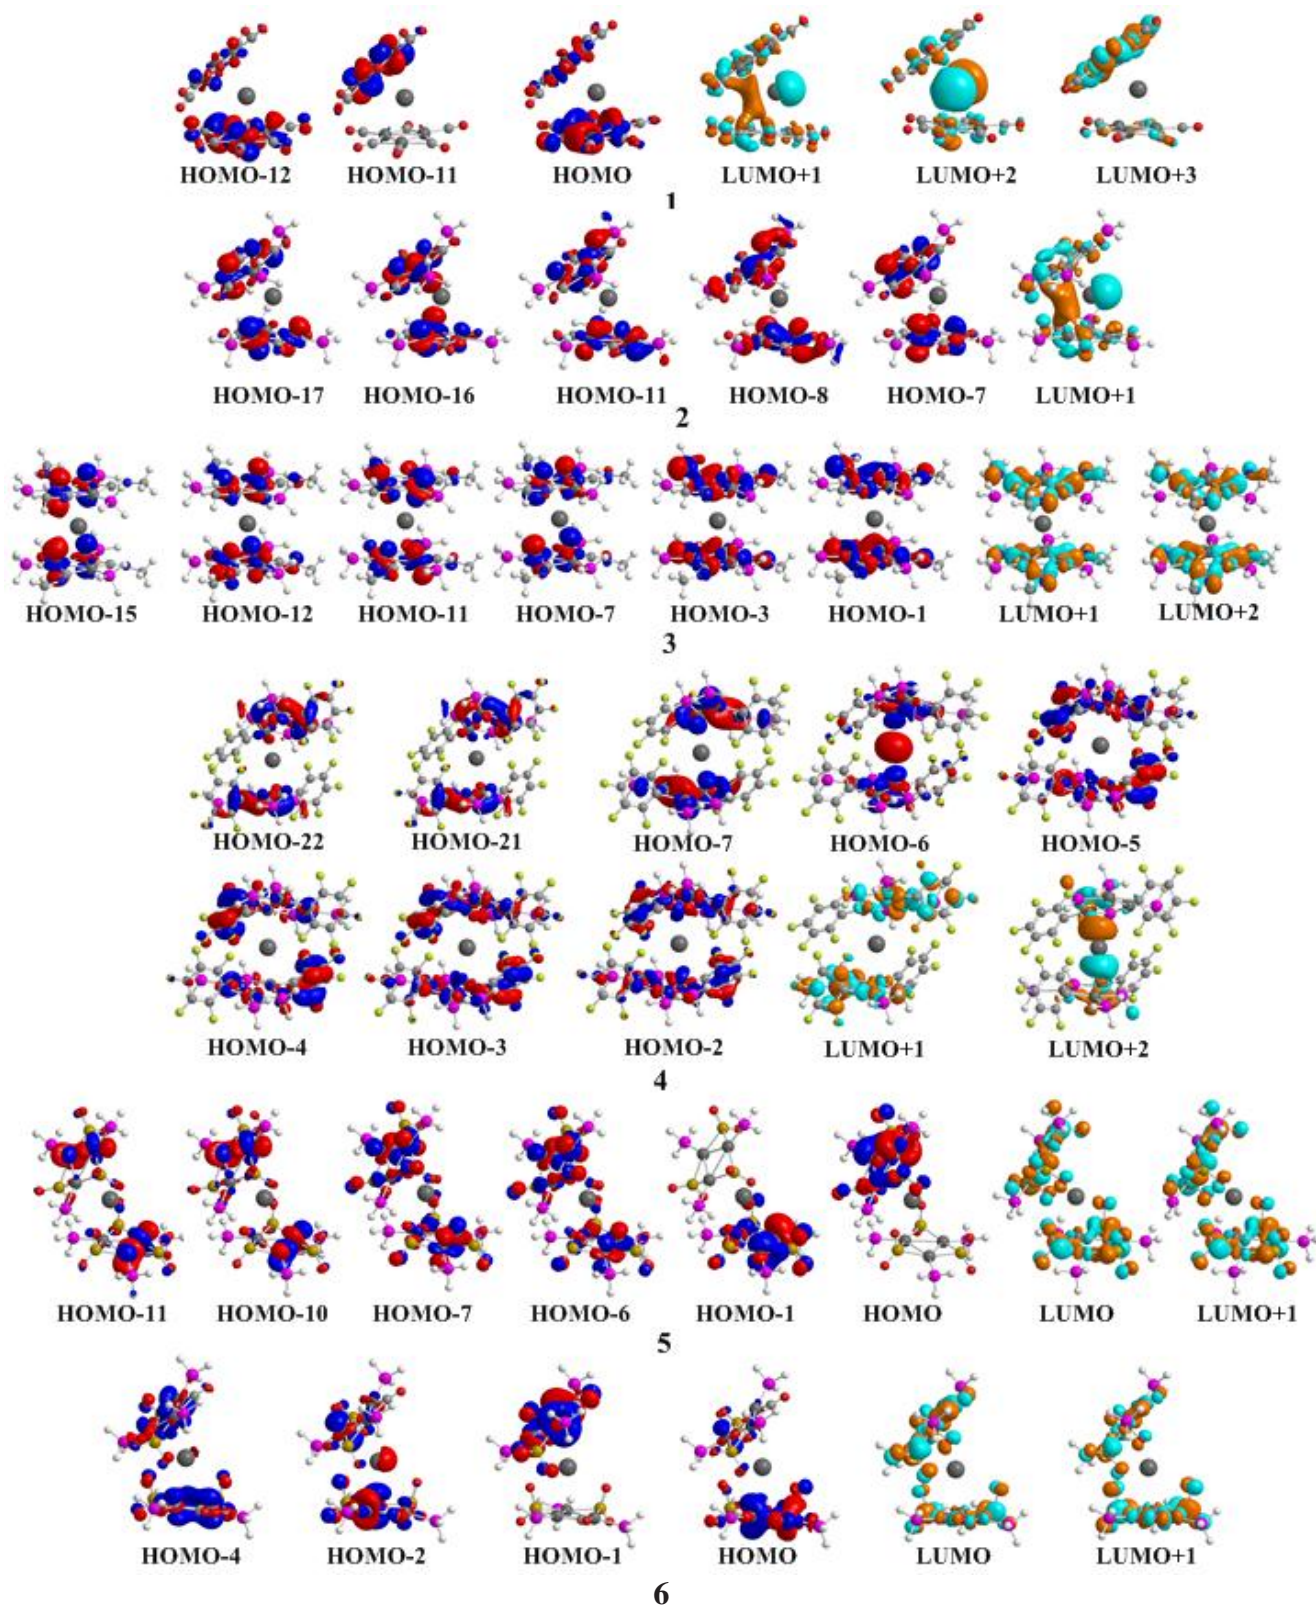

**Fig. S2** 3D contour plots of the MOs involved in the electronic transitions of the absorption spectra of the  $\{[\text{Pt}_3(\mu_2\text{-L})_3(\text{L}')_3]_2(\mu_6\text{-Ti})\}^+$  clusters at the B3LYP/LANL2TZ(f)(Pt)U6-31G(d,p)(E) level.

**Table S1.** Structural changes of selected structural parameters of the  $\{[\text{Pt}_3(\mu_2\text{-L})_3(\text{L}')_3]_2(\mu_6\text{-Tl})\}^+$  sandwiches, upon  $S_0 \rightarrow T_1$  excitation, calculated at the B3LYP/LANL2TZ(f)(Pt)  $\cup$  6-31G(d,p)(E) level.<sup>a</sup>

| Parameter                                          | 1      | 2      | 3      | 4      | 5      | 6      |
|----------------------------------------------------|--------|--------|--------|--------|--------|--------|
| Pt <sub>1</sub> -Pt <sub>2</sub>                   | 0.005  | -0.009 | -0.012 | -0.009 | -0.028 | -0.108 |
| Pt <sub>2</sub> -Pt <sub>3</sub>                   | 0.016  | -0.02  | -0.012 | -0.428 | -0.03  | -0.136 |
| Pt <sub>3</sub> -Pt <sub>1</sub>                   | -0.018 | -0.016 | -0.012 | 0.184  | -0.017 | -0.074 |
| Pt-L <sub>1</sub>                                  | -0.01  | -0.002 | 0.004  | -0.024 | -0.004 | 0.009  |
| Pt-L <sub>2</sub>                                  | 0.004  | 0.003  | 0.003  | 0.009  | -0.014 | -0.004 |
| Pt-L <sub>3</sub>                                  | 0.002  | -0.023 | 0.002  | -0.04  | -0.015 | 0.028  |
| Pt <sub>1</sub> -X <sub>1</sub>                    | 0.074  | -0.083 | -0.02  | -0.121 | -0.048 | -0.046 |
| Pt <sub>2</sub> -X <sub>1</sub>                    | -0.117 | 0.06   | 0.009  | 0.009  | -0.038 | -0.011 |
| Pt <sub>2</sub> -X <sub>2</sub>                    | -0.097 | 0.017  | -0.018 | -0.036 | -0.022 | -0.036 |
| Pt <sub>3</sub> -X <sub>2</sub>                    | 0.051  | -0.009 | 0.009  | -0.028 | -0.041 | -0.129 |
| Pt <sub>3</sub> -X <sub>3</sub>                    | -0.013 | 0.042  | -0.018 | 0.134  | -0.026 | 0.002  |
| Pt <sub>1</sub> -X <sub>3</sub>                    | 0.027  | -0.099 | 0.008  | -0.015 | -0.017 | 0.054  |
| Cd-Tl                                              | 0.078  | -0.223 | 0.3    | 0.5    | 1.167  | 0.703  |
| <Pt <sub>1</sub> -Pt <sub>2</sub> -Pt <sub>3</sub> | -0.7   | 0      | 0      | 7      | 0.3    | 1      |
| <Pt <sub>2</sub> -Pt <sub>3</sub> -Pt <sub>1</sub> | 0.2    | 0.2    | 0      | -7.3   | -0.1   | 0      |
| <Pt <sub>2</sub> -Pt <sub>1</sub> -Pt <sub>3</sub> | 0.5    | -0.1   | 0      | 0.3    | -0.2   | -1     |
| <Pt-X <sub>1</sub> -Pt                             | 1.3    | 0.2    | -0.2   | -5.2   | 0.7    | -2.3   |
| <X <sub>1</sub> -Pt-X <sub>2</sub>                 | 6.1    | -3.6   | 1.4    | 8.7    | -5.9   | -2.1   |
| <X <sub>1</sub> -Pt-L <sub>1</sub>                 | -0.7   | -0.7   | 9.1    | 4.1    | 2.5    | 1.8    |
| <Tl-Cd-Pt <sub>1</sub>                             | -17.3  | 3.2    | 0.2    | -2.6   | 9.7    | -20.8  |

<sup>a</sup> Positive sign means increase while negative sign means decrease of the structural parameter.

**Table S2.** Absolute difference between the structural changes of selected structural parameters of the  $\{[\text{Pt}_3(\mu_2\text{-L})_3(\text{L}')_3]_2(\mu_6\text{-Ti})\}^+$  sandwiches and  $\{[\text{Pt}_3(\mu_2\text{-L})_3(\text{L}')_3](\mu_3\text{-Ti})\}^+$  half-sandwiches, upon  $S_0 \rightarrow T_1$  excitation, calculated at the B3LYP/LANL2TZ(f)(Pt)  $\cup$  6-31G(d,p)(E) level.<sup>a</sup>

| Parameter                                          | 1     | 2     | 3     | 4     | 5     | 6     |
|----------------------------------------------------|-------|-------|-------|-------|-------|-------|
| Pt <sub>1</sub> -Pt <sub>2</sub>                   | 0.004 | 0.003 | 0.063 | 0.009 | 0.049 | 0.101 |
| Pt <sub>2</sub> -Pt <sub>3</sub>                   | 0.007 | 0.018 | 0.035 | 0.419 | 0.014 | 0.028 |
| Pt <sub>3</sub> -Pt <sub>1</sub>                   | 0.009 | 0.076 | 0.088 | 0.135 | 0.024 | 0.036 |
| Pt-L <sub>1</sub>                                  | 0.008 | 0.008 | 0.004 | 0.005 | 0.012 | 0.004 |
| Pt-L <sub>2</sub>                                  | 0.002 | 0.008 | 0.007 | 0.011 | 0.011 | 0.011 |
| Pt-L <sub>3</sub>                                  | 0.000 | 0.008 | 0.015 | 0.002 | 0.002 | 0.027 |
| Pt <sub>1</sub> -X <sub>1</sub>                    | 0.062 | 0.001 | 0.107 | 0.060 | 0.022 | 0.035 |
| Pt <sub>2</sub> -X <sub>1</sub>                    | 0.105 | 0.015 | 0.075 | 0.047 | 0.012 | 0.040 |
| Pt <sub>2</sub> -X <sub>2</sub>                    | 0.085 | 0.058 | 0.084 | 0.017 | 0.034 | 0.007 |
| Pt <sub>3</sub> -X <sub>2</sub>                    | 0.039 | 0.073 | 0.162 | 0.026 | 0.027 | 0.109 |
| Pt <sub>3</sub> -X <sub>3</sub>                    | 0.001 | 0.47  | 0.055 | 0.063 | 0.008 | 0.043 |
| Pt <sub>1</sub> -X <sub>3</sub>                    | 0.015 | 0.079 | 0.054 | 0.016 | 0.039 | 0.016 |
| Cd-Tl                                              | 0.194 | 0.008 | 0.600 | 0.39  | 0.104 | 0.499 |
| <Pt <sub>1</sub> -Pt <sub>2</sub> -Pt <sub>3</sub> | 0.7   | 2.1   | 0.0   | 5.5   | 0.1   | 0.6   |
| <Pt <sub>2</sub> -Pt <sub>3</sub> -Pt <sub>1</sub> | 0.2   | 0.8   | 1.0   | 1.4   | 0.7   | 1.7   |
| <Pt <sub>2</sub> -Pt <sub>1</sub> -Pt <sub>3</sub> | 0.5   | 1.0   | 1.5   | 7.1   | 0.2   | 1.1   |
| <Pt-X <sub>1</sub> -Pt                             | 1.1   | 0.8   | 3.3   | 4.9   | 13    | 1.4   |
| <X <sub>1</sub> -Pt-X <sub>2</sub>                 | 5.2   | 7.7   | 3.8   | 5.0   | 5.3   | 22.9  |
| <X <sub>1</sub> -Pt-L <sub>1</sub>                 | 0.6   | 2.3   | 9.025 | 2.0s  | 1.5   | 6.6   |
| <Ti-Cd-Pt <sub>1</sub>                             | 17.3  | 12.3  | 0.153 | 9.5   | 2.9   | 10.3  |



**Table S3.** Cartesian coordinates and energetic results of the  $\{[\text{Pt}_3(\mu_2\text{-L})_3(\text{L}')_3]_2(\mu_6\text{-Tl})\}^+$  sandwich-type clusters at the B3LYP/LANL2TZ(f)(Pt)  $\cup$  6-31G(d,p)(E) level.

| <b>1</b>                                                  |               |               |               |
|-----------------------------------------------------------|---------------|---------------|---------------|
| Pt                                                        | -1.4309523655 | 0.9508380498  | -2.2778883604 |
| Pt                                                        | -0.1319075362 | -1.1690464981 | -3.4347748765 |
| Pt                                                        | 1.3029807354  | 0.9419837613  | -2.4212572759 |
| O                                                         | -3.2128072739 | -1.1845526415 | -3.6443278952 |
| O                                                         | 2.9270589803  | -1.2699431576 | -3.8502703396 |
| O                                                         | 0.0048344384  | 3.5144097278  | -1.3166250206 |
| O                                                         | -0.1894873409 | -3.916950797  | -4.7890211964 |
| O                                                         | 4.0184293399  | 2.2303290602  | -1.8253166783 |
| O                                                         | -4.0369208145 | 2.2922339021  | -1.3871751369 |
| C                                                         | -2.188852744  | -0.7623407951 | -3.295061768  |
| C                                                         | 3.0062830586  | 1.7516519313  | -2.0498598432 |
| C                                                         | -0.0093091525 | 2.4275414988  | -1.7314349687 |
| C                                                         | 1.9457704703  | -0.7998892437 | -3.443215395  |
| C                                                         | -0.1672037412 | -2.8922517236 | -4.286177153  |
| C                                                         | -3.0671802986 | 1.7912052878  | -1.7245122378 |
| Tl                                                        | -0.172327554  | -0.9834369318 | -0.048568264  |
| Pt                                                        | -0.3448901346 | 1.5025053966  | 2.4837736913  |
| Pt                                                        | -0.934099773  | -1.0931582954 | 3.1594256763  |
| Pt                                                        | 1.6358911294  | -0.393798075  | 2.5243675588  |
| O                                                         | -3.2696225928 | 0.9284650194  | 3.2931012292  |
| O                                                         | 1.2275866978  | -3.2435902533 | 3.6681912604  |
| O                                                         | 2.5108487427  | 2.5026757895  | 1.8816248269  |
| O                                                         | -3.0147468297 | -3.1928303087 | 3.9666813719  |
| O                                                         | 4.5755196408  | -1.1456744416 | 2.1005945593  |
| O                                                         | -1.2694834907 | 4.3875873464  | 2.0248194186  |
| C                                                         | -2.1674226505 | 0.6328125241  | 3.0734920898  |
| C                                                         | 3.4798759842  | -0.8655834411 | 2.2617229465  |
| C                                                         | 1.7091167374  | 1.6970081931  | 2.1276074503  |
| C                                                         | 0.8477060739  | -2.2123737448 | 3.2928749257  |
| C                                                         | -2.2400783199 | -2.4089690659 | 3.6679256445  |
| C                                                         | -0.9231114164 | 3.312948926   | 2.1939377601  |
| Zero-point correction= 0.098913 (Hartree/Particle)        |               |               |               |
| Thermal correction to Energy= 0.142719                    |               |               |               |
| Thermal correction to Enthalpy= 0.143664                  |               |               |               |
| Thermal correction to Gibbs Free Energy= 0.000322         |               |               |               |
| Sum of electronic and zero-point Energies= -2077.167235   |               |               |               |
| Sum of electronic and thermal Energies= -2077.123429      |               |               |               |
| Sum of electronic and thermal Enthalpies= -2077.122484    |               |               |               |
| Sum of electronic and thermal Free Energies= -2077.265826 |               |               |               |



2

Tl 0.008646448 0.9891912478 -0.052472736  
Pt 2.6024054329 -0.1036429568 -1.4123632688  
Pt 2.1972579747 -1.3245848997 0.9728514255  
Pt 3.0682009181 1.2465754847 0.8969864856  
P 2.6604962762 -0.1676548717 -3.7068138791  
P 1.6550897397 -3.1863297906 2.2078341837  
P 3.7858480842 3.1148378578 2.0215762969  
O 1.7419438977 -3.0693883912 -1.5328707537  
O 2.8236478505 -0.0232129799 3.7075462374  
O 3.9542373318 2.6756526908 -1.6961910537  
C 2.0074297979 -2.0762283533 -0.9653081785  
C 2.7223668887 -0.0316018291 2.5401330241  
C 3.455720157 1.8107568912 -1.0860685141  
Pt -2.5950664431 0.0967877143 1.4300010739  
Pt -3.0629170202 1.2791431301 -0.9695745268  
Pt -2.2571066818 -1.3123416402 -0.8598865462  
P -2.6146490743 0.2141129608 3.7230170553  
P -3.7486645472 3.0759565337 -2.2230795288  
P -1.7734186117 -3.2726562525 -1.9590412955  
O -3.8690462874 2.9252215954 1.5183035155  
O -2.9121471635 -0.2121099631 -3.6755494076  
O -1.8323002273 -2.8788786017 1.7661166901  
C -3.4025620069 2.0035866649 0.9688585554  
C -2.7829907056 -0.1297314656 -2.5138542787  
C -2.06753176 -1.9213714628 1.128294467  
H 3.9305608857 -0.0519302232 -4.3106606104  
H 1.9756568947 0.8252299357 -4.4402422991  
H 2.1888178177 -1.3155627522 -4.3783468342  
H 2.7419190346 -3.8672285986 2.7968288442  
H 1.0086905618 -4.2708622919 1.581297967  
H 0.8319252001 -3.04227514 3.3431005826  
H 4.1681223822 4.2558060183 1.2854511927  
H 4.9290099715 2.965854874 2.834990721  
H 2.9225732744 3.7204103337 2.9600087113  
H -2.1542132073 -0.8868842668 4.4759803281  
H -3.8717287579 0.4034761181 4.3353563408  
H -1.89805922 1.2471736342 4.3648555058  
H -4.1004212787 4.2753671756 -1.5692858217  
H -4.9006718295 2.8938016802 -3.0170011202  
H -2.8792066341 3.5926054495 -3.2078073567  
H -1.1616422104 -4.3302134428 -1.2562260451  
H -0.9449325319 -3.2342920823 -3.0989970839  
H -2.8801966211 -3.9590967342 -2.5026370649

Zero-point correction= 0.217979 (Hartree/Particle)  
Thermal correction to Energy= 0.265417  
Thermal correction to Enthalpy= 0.266361  
Thermal correction to Gibbs Free Energy= 0.119008

|                                              |              |
|----------------------------------------------|--------------|
| Sum of electronic and zero-point Energies=   | -3456.039592 |
| Sum of electronic and thermal Energies=      | -3455.992155 |
| Sum of electronic and thermal Enthalpies=    | -3455.991211 |
| Sum of electronic and thermal Free Energies= | -3456.138563 |

3

Pt 1.4493314742 -0.5658295342 -2.829271848  
Pt -0.2338715088 1.5381202252 -2.830771315  
Pt -1.2148393295 -0.971490498 -2.8276477736  
P 3.6339846758 -1.2199147806 -2.8203030457  
P -0.7604544828 3.7570252408 -2.8219351834  
P -2.8740933184 -2.5358525901 -2.8126493172  
N 2.8742584578 2.1577579825 -3.1704192266  
C 1.8722842044 1.4872090222 -2.9789482368  
C 3.1036413562 3.5683042409 -3.372870795  
N -3.3057828249 1.4097461986 -3.1696827062  
C -2.223863263 0.8777290197 -2.9784031342  
C -4.6418692914 0.9018663551 -3.3715690749  
N 0.431084542 -3.5698084194 -3.1510102615  
C 0.3517968679 -2.3653099821 -2.9694513958  
C 1.5363583327 -4.4776360539 -3.3455024945  
H 4.1446743734 -2.1327910637 -1.8673656675  
H 4.5816994635 -0.1854877871 -2.6598506782  
H 4.1761399057 -1.8253371859 -3.9775376044  
H -2.1271789632 4.062117756 -2.6409735674  
H -0.5247398035 4.5225691039 -3.9872711653  
H -0.2097858473 4.6605399039 -1.8819866704  
H -3.6631969616 -2.7135623564 -3.9725515123  
H -3.9251594519 -2.5131154601 -1.8654974882  
H -2.4514073958 -3.8713960437 -2.6366765079  
H 3.5496100898 3.7252017761 -4.3592545246  
H 3.8134781942 3.9346045683 -2.6255864094  
H 2.1760872976 4.1508393221 -3.3051627668  
H -4.999070338 1.2045682473 -4.3600457702  
H -5.3152609189 1.3366088767 -2.627341289  
H -4.6818866406 -0.1923592483 -3.2984112295  
H 1.4497543549 -4.9483402077 -4.3289951407  
H 1.4954207365 -5.2703249261 -2.5930317053  
H 2.5059469151 -3.9678901595 -3.2793664356  
Pt 1.4553994406 -0.550315124 2.8266858965  
Pt -0.2480917002 1.5374996985 2.8294678038  
Pt -1.2047556688 -0.9819011472 2.8260118996  
P 3.6457141123 -1.1838654434 2.8129369481  
P -0.7961569362 3.7511692922 2.8119814435  
P -2.8485409873 -2.5625207002 2.809805171  
N 2.8523673446 2.1868255544 3.1768016577  
C 1.8582848458 1.506190989 2.9803235344  
C 3.0664353433 3.5988408746 3.3873991313  
N -3.3165521641 1.3796600321 3.1783581075  
C -2.2308043201 0.8574733971 2.9817321041  
C -4.6471785895 0.859288317 3.3840590628  
N 0.4660789275 -3.5635892608 3.1540394751  
C 0.3754301946 -2.3602890445 2.9690174804  
C 1.5797949939 -4.4595989581 3.3536791694

|    |               |               |               |
|----|---------------|---------------|---------------|
| H  | 4.1578117987  | -2.1171454768 | 1.8806055396  |
| H  | 4.5820012248  | -0.1453220875 | 2.6173804851  |
| H  | 4.201738649   | -1.7523782554 | 3.9821580037  |
| H  | -2.1569427338 | 4.0453368549  | 2.5778281625  |
| H  | -0.6170111535 | 4.5085813189  | 3.9926419823  |
| H  | -0.2173733854 | 4.669064053   | 1.9035908073  |
| H  | -3.6382223662 | -2.7458002924 | 3.9683811789  |
| H  | -3.8975652335 | -2.5501158731 | 1.8602748288  |
| H  | -2.4139090113 | -3.8947086485 | 2.6365722492  |
| H  | 3.5156724611  | 3.7541748963  | 4.3724596168  |
| H  | 3.7679459106  | 3.9781345794  | 2.6388463912  |
| H  | 2.1321127291  | 4.1713740747  | 3.3287030819  |
| H  | -5.0046572132 | 1.1589281911  | 4.3733775128  |
| H  | -5.326635606  | 1.2875186155  | 2.6415213577  |
| H  | -4.6771174332 | -0.2353841655 | 3.3114595177  |
| H  | 1.4910599959  | -4.9351728054 | 4.3346825057  |
| H  | 1.5536153165  | -5.250010279  | 2.5979930097  |
| H  | 2.5438931894  | -3.9385479284 | 3.2969861204  |
| Tl | 0.0030674999  | 0.0082430729  | -0.0004192946 |

|                                              |                             |
|----------------------------------------------|-----------------------------|
| Zero-point correction=                       | 0.455852 (Hartree/Particle) |
| Thermal correction to Energy=                | 0.515971                    |
| Thermal correction to Enthalpy=              | 0.516915                    |
| Thermal correction to Gibbs Free Energy=     | 0.339946                    |
| Sum of electronic and zero-point Energies=   | -3572.281699                |
| Sum of electronic and thermal Energies=      | -3572.221580                |
| Sum of electronic and thermal Enthalpies=    | -3572.220636                |
| Sum of electronic and thermal Free Energies= | -3572.397605                |

4

|    |          |          |          |
|----|----------|----------|----------|
| Pt | -2.11021 | 1.11185  | -1.65503 |
| Pt | -3.82041 | 0.361    | 0.66736  |
| Pt | -3.46333 | -1.52304 | -1.33098 |
| P  | -2.8634  | 2.33479  | 0.12103  |
| P  | -2.35155 | -0.62809 | -3.12986 |
| P  | -4.83995 | 0.99803  | 2.60113  |
| P  | -4.01568 | -3.53052 | -2.23676 |
| F  | 0.98942  | 1.04197  | -2.62904 |
| F  | 2.44008  | 2.79751  | -4.05652 |
| F  | 1.32316  | 5.12934  | -4.94538 |
| F  | -1.29529 | 5.68401  | -4.37122 |
| F  | -2.76981 | 3.95149  | -2.93217 |
| F  | -2.15128 | -2.43981 | 1.53207  |
| F  | -3.22493 | -3.74839 | 3.61694  |
| F  | -5.92665 | -3.97117 | 3.84733  |
| F  | -7.57186 | -2.86833 | 1.98149  |
| F  | -6.5246  | -1.55607 | -0.12724 |
| C  | -0.962   | 2.42513  | -2.72279 |
| C  | 0.37179  | 2.19034  | -3.04307 |
| C  | 1.14931  | 3.07781  | -3.78058 |
| C  | 0.58923  | 4.26711  | -4.23762 |
| C  | -0.74442 | 4.54489  | -3.9425  |
| C  | -1.48565 | 3.629    | -3.19694 |
| C  | -4.29111 | -1.89271 | 0.61787  |
| C  | -3.49927 | -2.50747 | 1.60863  |
| C  | -4.02011 | -3.19952 | 2.69307  |
| C  | -5.40738 | -3.318   | 2.81479  |
| C  | -6.2481  | -2.74946 | 1.85484  |
| C  | -5.68096 | -2.06698 | 0.78396  |
| H  | -3.76196 | 3.39429  | -0.13197 |
| H  | -2.087   | 2.91843  | 1.14952  |
| H  | -1.28071 | -1.36825 | -3.68291 |
| H  | -3.09151 | -0.36703 | -4.30405 |
| H  | -4.66444 | 0.17146  | 3.73129  |
| H  | -6.2495  | 1.06227  | 2.56487  |
| H  | -4.55432 | 2.24913  | 3.17885  |
| H  | -4.60497 | -4.50695 | -1.40521 |
| H  | -3.01283 | -4.32255 | -2.83731 |
| H  | -4.96028 | -3.52127 | -3.28518 |
| Tl | -0.0052  | -0.41749 | -0.04293 |
| Pt | 2.14828  | 0.78234  | 1.7711   |
| Pt | 3.40886  | -1.82198 | 1.05947  |
| Pt | 3.83671  | 0.32134  | -0.64091 |
| P  | 2.32452  | -1.16302 | 2.97324  |
| P  | 2.9486   | 2.22592  | 0.19217  |
| P  | 3.88824  | -3.95895 | 1.65884  |
| P  | 4.88297  | 1.19894  | -2.46297 |
| F  | 2.90488  | 3.37789  | 3.45047  |

|   |          |          |          |
|---|----------|----------|----------|
| F | 1.48899  | 4.93104  | 5.13264  |
| F | -1.149   | 4.39125  | 5.62576  |
| F | -2.34566 | 2.25674  | 4.40634  |
| F | -0.95448 | 0.68003  | 2.73223  |
| F | 6.47015  | -1.78524 | -0.14493 |
| F | 7.47535  | -2.81324 | -2.42493 |
| F | 5.79666  | -3.57318 | -4.42712 |
| F | 3.10405  | -3.28984 | -4.15971 |
| F | 2.0724   | -2.26107 | -1.90381 |
| C | 1.04456  | 1.96417  | 3.02342  |
| C | 1.60937  | 3.06578  | 3.66822  |
| C | 0.89916  | 3.88771  | 4.54238  |
| C | -0.44429 | 3.61706  | 4.79689  |
| C | -1.04504 | 2.52862  | 4.17126  |
| C | -0.29757 | 1.73232  | 3.30913  |
| C | 4.22802  | -1.92994 | -0.92522 |
| C | 5.61117  | -2.12766 | -1.11857 |
| C | 6.15636  | -2.6668  | -2.27886 |
| C | 5.29837  | -3.05911 | -3.30915 |
| C | 3.9159   | -2.91009 | -3.16786 |
| C | 3.4173   | -2.36512 | -1.99287 |
| H | 1.22708  | -1.93877 | 3.414    |
| H | 3.0702   | -1.10396 | 4.17112  |
| H | 3.88319  | 3.20441  | 0.59596  |
| H | 2.19567  | 2.98152  | -0.73701 |
| H | 4.44341  | -4.82308 | 0.69074  |
| H | 2.85718  | -4.79457 | 2.14085  |
| H | 4.83135  | -4.13697 | 2.69345  |
| H | 4.67971  | 0.55508  | -3.70208 |
| H | 6.29385  | 1.20549  | -2.42224 |
| H | 4.64471  | 2.53117  | -2.84897 |

|                                              |                             |
|----------------------------------------------|-----------------------------|
| Zero-point correction=                       | 0.390117 (Hartree/Particle) |
| Thermal correction to Energy=                | 0.466661                    |
| Thermal correction to Enthalpy=              | 0.467605                    |
| Thermal correction to Gibbs Free Energy=     | 0.255986                    |
| Sum of electronic and zero-point Energies=   | -6370.875892                |
| Sum of electronic and thermal Energies=      | -6370.799348                |
| Sum of electronic and thermal Enthalpies=    | -6370.798404                |
| Sum of electronic and thermal Free Energies= | -6371.010023                |

5

Pt 1.2097684799 1.2895032055 3.6921577126  
Pt -1.2079154682 0.2218309217 2.8306102882  
Pt 0.6163041669 -1.3982739401 4.1621475595  
S -0.3473342036 2.3318200935 2.3153540575  
P 1.0473296755 -3.3171363657 5.3826640148  
S 2.6600510033 -0.3300451181 4.6004471585  
S -1.319679685 -2.1161630947 3.0756380824  
P -3.421815978 0.5550960724 2.2017467162  
P 2.4946294312 3.1235313818 4.2763178852  
O 0.1120372846 2.3523005943 0.8927762811  
O -1.0416275104 3.5406445463 2.7930401494  
O 3.0074891932 -0.1581919575 6.0216977752  
O 3.7160721457 -0.7291548615 3.6556209464  
O -1.0135370912 -2.7704670345 1.7803304229  
O -2.4027280533 -2.6870113348 3.8934294452  
H 0.6297230728 -3.2611060055 6.726154639  
H 2.3867105678 -3.724265767 5.5358697945  
H 0.4490304599 -4.5220795668 4.9669730879  
H -4.0870753378 -0.4734410405 1.5136223468  
H -3.7422151348 1.6724360971 1.4128428689  
H -4.2748236928 0.7440861962 3.3069388013  
H 2.3707213766 4.3014546694 3.5144995993  
H 3.894980487 2.9760510844 4.3071279036  
H 2.2511818642 3.6199797263 5.5713015389  
Tl 0.405341041 -0.5602122863 -0.02484714  
Pt -0.2832436252 1.2965682332 -2.7540945919  
Pt -1.7093803008 -0.9065932097 -3.6705203494  
Pt 1.008778913 -0.652145039 -4.2570493236  
S -2.4638932384 0.6983755507 -2.1667364024  
P 2.7912827843 -1.2677050294 -5.599179395  
S 2.033995719 1.1084267 -3.1197773739  
S -0.3469472238 -2.5082426524 -4.733471447  
P -3.7267366644 -1.9014623392 -4.214896264  
P -0.2820737447 3.4976961502 -2.0038463739  
O -2.4793542452 0.1690775133 -0.7685858683  
O -3.5883103124 1.5726724117 -2.5446030062  
O 2.7076750554 2.148581171 -3.9146917595  
O 2.7009963858 0.6473255005 -1.8779516377  
O -0.0505821383 -3.6579061184 -3.8630563705  
O -0.6317895299 -2.7517394541 -6.1581715404  
H 2.72972854 -0.7723517567 -6.915741882  
H 4.0848230004 -0.8601424099 -5.2206311916  
H 3.0040780431 -2.6389324466 -5.8392163645  
H -3.7732493726 -3.3053140043 -4.3184674766  
H -4.8399205215 -1.6616100036 -3.386336518  
H -4.2451499707 -1.5252019613 -5.4688428575  
H -1.3068987469 3.9211057246 -1.1413359745  
H 0.8587911673 3.9813778418 -1.3416972696



H -0.4052420678 4.4269514113 -3.0555606973

|                                              |                             |
|----------------------------------------------|-----------------------------|
| Zero-point correction=                       | 0.227343 (Hartree/Particle) |
| Thermal correction to Energy=                | 0.284203                    |
| Thermal correction to Enthalpy=              | 0.285147                    |
| Thermal correction to Gibbs Free Energy=     | 0.115839                    |
| Sum of electronic and zero-point Energies=   | -6067.569000                |
| Sum of electronic and thermal Energies=      | -6067.512140                |
| Sum of electronic and thermal Enthalpies=    | -6067.511196                |
| Sum of electronic and thermal Free Energies= | -6067.680503                |

6

Pt 3.8317051274 0.4944879711 -1.4868641212  
Pt 2.9537407086 1.4040323904 0.8978642337  
Pt 3.2100068179 -1.3384854195 0.5147746116  
P 4.7773459028 1.0340631837 -3.5201791137  
P 2.4220351354 3.2913367636 2.1221072236  
P 3.3968516434 -3.4925376357 1.3420091176  
C 3.4052366462 2.4014179613 -0.8472152377  
S 2.3753342 -0.2575653592 2.4409920532  
S 3.6472156794 -1.8348433747 -1.7718104315  
O 3.3431923908 3.4815031823 -1.2935626196  
O 0.8957705192 -0.4807266711 2.5141952996  
O 3.1128134893 -0.368901047 3.7116961867  
O 4.8561421161 -2.6145678547 -2.0885006153  
O 2.3859227836 -2.1988327134 -2.4592074499  
H 4.3127974308 0.3827206996 -4.6806274539  
H 6.1618317872 0.8014334768 -3.6439018026  
H 4.7035632409 2.3785143763 -3.935427589  
H 1.4296713064 3.1889286495 3.1144765821  
H 1.9480962961 4.394891878 1.3890119801  
H 3.4606116374 3.8952329051 2.8601734401  
H 2.6311161034 -3.8558155692 2.4673747043  
H 4.689040693 -3.8333869589 1.787127459  
H 3.1236320958 -4.576713609 0.4850702896  
Pt -4.056878761 -1.0312488341 -0.8355360079  
Pt -3.4670200632 1.6005665377 -0.6425870113  
Pt -2.6269640318 -0.1180284448 1.3655447099  
P -5.2902076451 -2.63680108 -1.9442768887  
P -3.8982072873 3.7078364938 -1.4743828669  
P -1.9892141253 -0.4516066483 3.5706656627  
C -4.3741455386 0.5193515346 -2.1428213655  
S -2.0058331436 2.1500981696 1.1213867545  
S -3.0545374571 -2.3788825457 0.8121025387  
O -4.7562722443 0.6894006645 -3.2360815082  
O -0.5884447338 2.2549945476 0.6690539021  
O -2.4403586149 3.1140709782 2.150581102  
O -3.90983831 -3.1836400079 1.7019548707  
O -1.7855914474 -3.0069804364 0.3445832078  
H -4.7101510505 -3.8997582404 -2.1784258551  
H -6.497080392 -3.0286839817 -1.331059481  
H -5.748393824 -2.3212275575 -3.2386674171  
H -2.8422977786 4.6372536672 -1.5701748342  
H -4.4301396815 3.7959581672 -2.7763472586  
H -4.8377247799 4.4797882824 -0.7614852007  
H -1.1938288043 0.5182335789 4.2025241295  
H -3.0913608546 -0.5136295254 4.4463921443  
H -1.3077986116 -1.6323968034 3.9112049241  
Tl 0.084828429 -0.7544517414 -0.362729998

|                                              |                             |
|----------------------------------------------|-----------------------------|
| Zero-point correction=                       | 0.224543 (Hartree/Particle) |
| Thermal correction to Energy=                | 0.278342                    |
| Thermal correction to Enthalpy=              | 0.279286                    |
| Thermal correction to Gibbs Free Energy=     | 0.117029                    |
| Sum of electronic and zero-point Energies=   | -5197.077251                |
| Sum of electronic and thermal Energies=      | -5197.023453                |
| Sum of electronic and thermal Enthalpies=    | -5197.022509                |
| Sum of electronic and thermal Free Energies= | -5197.184766                |
